# Supplementary material for: Polymer nanoparticles with an embedded phosphorescent osmium(ii) complex for cell imaging
Source: Royal Society of Chemistry journal article supplement (doi:10.1039/c0jm04235h), 2011-01-01
Supplement: c0jm04235h.pdf [file c0jm04235h.pdf]

## Supporting Information

### **Polymer Nanoparticles with an embedded Phosphorescent Osmium(II) Complex for Cell Imaging**

**Tianshe Yang,<sup>a,b</sup> Ao Xia,<sup>a</sup> Qian Liu,<sup>a</sup> Mei Shi,<sup>\*a</sup> Huazhou Wu,<sup>a</sup> Liqin Xiong,<sup>a</sup> Chunhui Huang,<sup>a</sup> Fuyou Li<sup>\*a</sup>**

<sup>a</sup> Department of Chemistry & Laboratory of Advanced Materials, Fudan University, Shanghai 200433, People's Republic of China

<sup>b</sup> Jiangxi Key Laboratory of Organic Chemistry, Jiangxi Science & Technology Normal University, Nanchang 330013, People's Republic of China

To whom correspondence should be addressed. E-mail: [fyli@fudan.edu.cn](mailto:fyli@fudan.edu.cn).

**Table S1** Selected bond distances (Å) and angles (deg) for  $[\text{Os}(\text{bpy})_2(\text{L}^{\wedge}\text{L})]^{2+}(\text{PF}_6^-)_2$

| $[\text{Os}(\text{bpy})_2(\text{L}^{\wedge}\text{L})]^{2+}(\text{PF}_6^-)_2$ |            |                 |            |
|------------------------------------------------------------------------------|------------|-----------------|------------|
| Os(1)-N(1)                                                                   | 2.134(4)   | Os(1)-N(2)      | 2.090(4)   |
| Os(1)-N(3)                                                                   | 2.111(4)   | Os(1)-N(4)      | 2.077(4)   |
| Os(1)-P(1)                                                                   | 2.2911(18) | Os(1)-P(2)      | 2.2844(18) |
| N(1)-Os(1)-N(2)                                                              | 76.90(17)  | N(1)-Os(1)-N(3) | 79.81(16)  |
| N(1)-Os(1)-N(4)                                                              | 93.67(16)  | N(2)-Os(1)-N(3) | 93.49(16)  |
| N(2)-Os(1)-N(4)                                                              | 168.16(16) | N(3)-Os(1)-N(4) | 77.63(16)  |
| N(1)-Os(1)-P(1)                                                              | 175.78(11) | N(1)-Os(1)-P(2) | 100.83(12) |
| N(2)-Os(1)-P(1)                                                              | 102.91(14) | N(2)-Os(1)-P(2) | 89.43(12)  |
| N(3)-Os(1)-P(1)                                                              | 96.01(12)  | N(3)-Os(1)-P(2) | 177.08(12) |
| N(4)-Os(1)-P(1)                                                              | 85.97(12)  | N(4)-Os(1)-P(2) | 99.47(12)  |
| P(2)-Os(1)-P(1)                                                              | 83.38(7)   |                 |            |

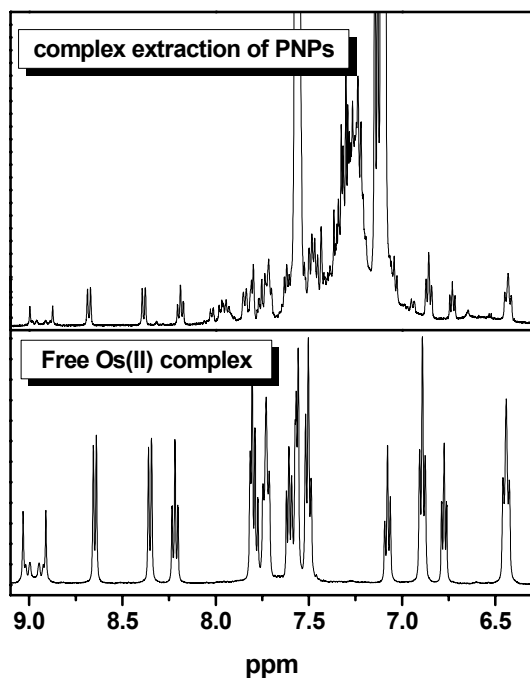

**Figure S1** NMR spectra of free Os(II) complex  $[\text{Os}(\text{bpy})_2(\text{L}^{\wedge}\text{L})]^{2+}(\text{PF}_6^-)_2$  and the complex extraction of PNPs using  $\text{CHCl}_3$  (solvent:  $\text{DMSO}-d_6$ ).

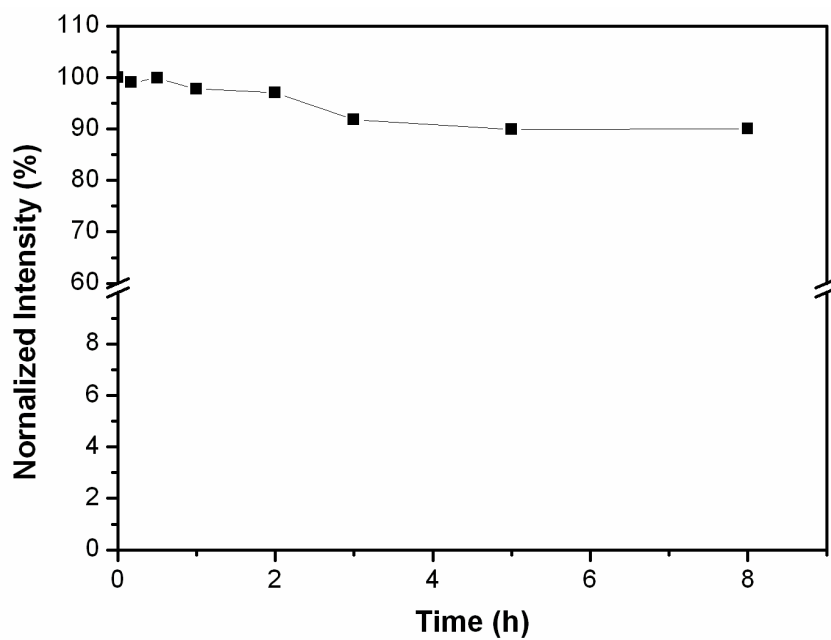

Figure S2. Photosatbility of PNPs in PBS solution under irradiation with UV light.

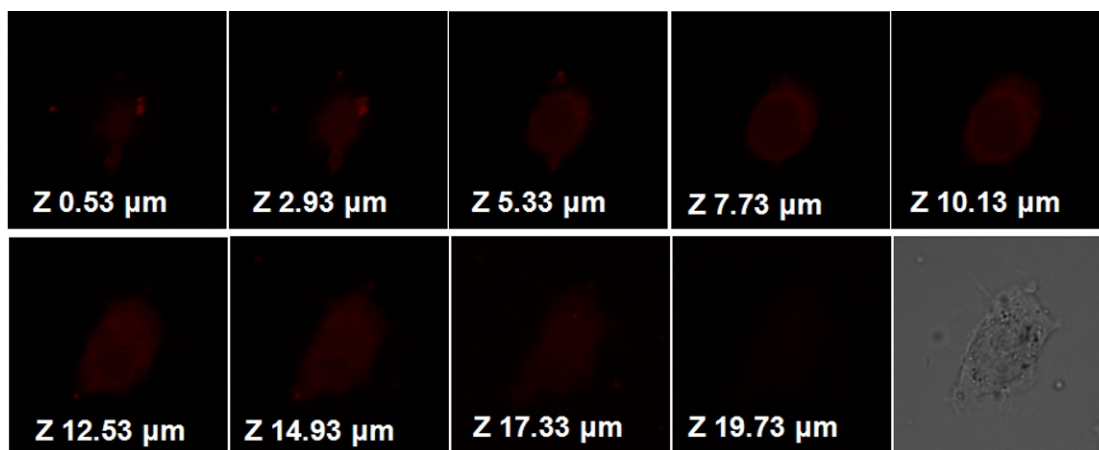

Figure S3 Z-scan images of the fixed KB cells incubated with 20  $\mu\text{M}$   $[\text{Os}(\text{bpy})_2(\text{L}^{\wedge}\text{L})]^{2+}(\text{PF}_6^-)_2$  in DMSO/medium (1:49, v/v) for 30 min at 37 °C.  $\lambda_{\text{ex}} = 488 \text{ nm}$ ;  $\lambda_{\text{em}} = 600 \pm 20 \text{ nm}$ .

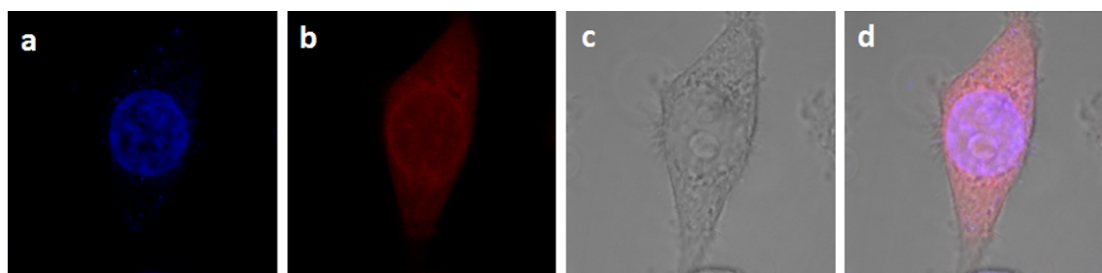

**Figure S4.** Confocal luminescence (*a* and *b*) and brightfield (*c*) images of the fixed KB cells stained with 20  $\mu\text{M}$   $[\text{Os}(\text{bpy})_2(\text{L}^\wedge\text{L})]^{2+}(\text{PF}_6^-)_2$  and 0.5  $\mu\text{g}/\text{mL}$  DAPI ( $\lambda_{\text{ex}} = 405 \text{ nm}$ ). The signals of DAPI and  $[\text{Os}(\text{bpy})_2(\text{L}^\wedge\text{L})]^{2+}(\text{PF}_6^-)_2$  were collected from the blue channel (channel-1:  $460 \pm 20 \text{ nm}$ ) and red channel (channel-2:  $600 \pm 20 \text{ nm}$ ), respectively. Overlay of panels (*a*), (*b*) and (*c*) is shown in panel (*d*). Herein, to avoid the interference of DAPI in obtaining signal from  $[\text{Os}(\text{bpy})_2(\text{L}^\wedge\text{L})]^{2+}(\text{PF}_6^-)_2$  in the cytoplasm, low concentration (0.5  $\mu\text{g}/\text{mL}$ ) of DAPI was used to stain the nuclei of KB cells.

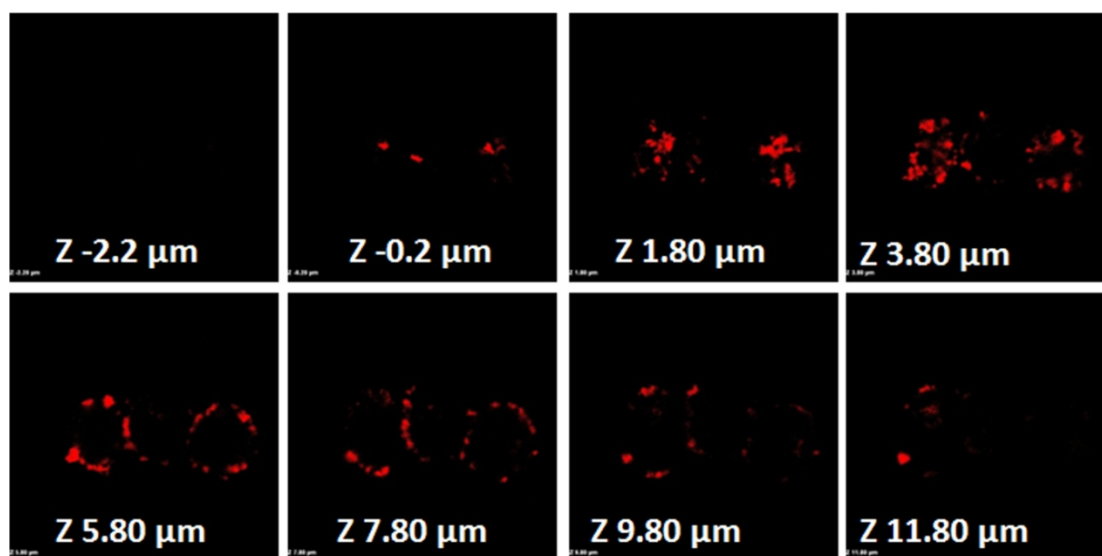

**Figure S5.** Z-scan images of the living KB cells incubated with 500  $\mu\text{g}/\text{mL}$  PNPs in MEM for 10 min at 37  $^\circ\text{C}$ . ( $\lambda_{\text{ex}} = 488 \text{ nm}$ ).

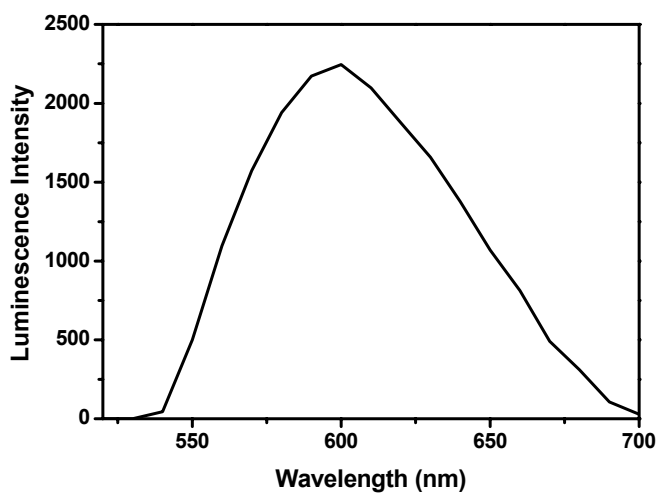

**Figure S6.** Photoluminescence spectrum obtained from the living KB cells incubated with 500  $\mu\text{g/mL}$  PNPs in MEM solution for 10 min at 37  $^{\circ}\text{C}$ . ( $\lambda_{\text{ex}} = 488 \text{ nm}$ ).

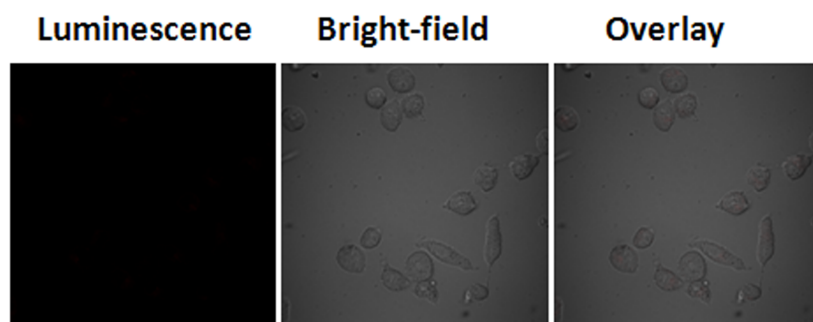

**Figure S7.** Confocal luminescence, bright-field, and overlay images of the KB cells incubated with MEM only at 37  $^{\circ}\text{C}$  as blank.

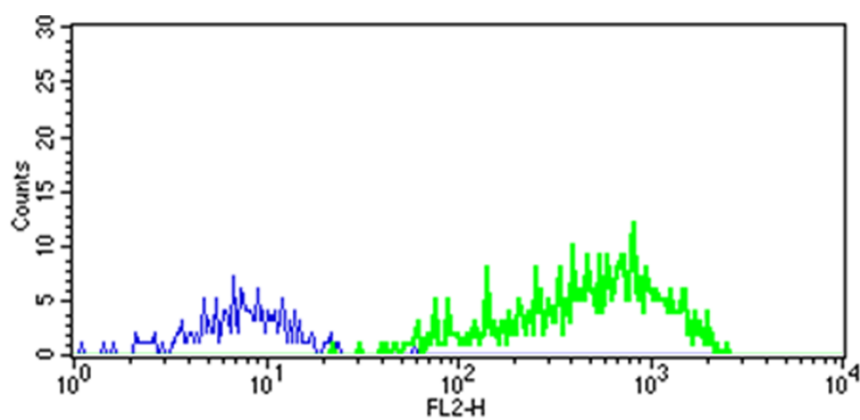

**Figure S8.** Flow cytometry analysis of KB cells incubated with or without 500  $\mu\text{g/mL}$  PNPs in PBS (pH 7.4) for 10 min at 37  $^{\circ}\text{C}$
